# Supplementary material
Source: HighWire-hosted journal article supplement (https://bmjpaedsopen.bmj.com/content/3/1/e000389)
Supplement: inline-supplementary-material-1 [file inline-supplementary-material-1.pdf]

## Supplementary Material

### **Appendix A** Hearing and vision assessment

The hearing assessment was carried out by audiologists and specially trained staff, and performed as per the British Society of Audiologists standards(13). Air conduction hearing thresholds were measured bilaterally at 500 Hz, 1kHz, 2kHz, 4kHz and 8kHz, and bone conduction thresholds were measured at 4 kHz for all children and at 1kHz if time permitted. Tympanometry was used to measure middle ear function bilaterally. Tympanograms were categorised according to the Jerger's modified Fieullau-Nikolajsen method(14), with type B tympanograms indicating the presence of otitis media with effusion (OME, 'glue ear').

The visual tests were undertaken by trained orthoptists and overseen by an ophthalmologist. Visual acuity was measured monocularly using the LogMAR test and was taken as the best of presenting (with glasses if worn) and presenting-plus-pinhole. Ocular misalignment was assessed using a simultaneous prism cover test and alternate prism cover test, and strabismus was classified according to the direction (convergent, divergent, vertical or mixed) and whether it was manifest (present in normal viewing with both eyes open), or latent (present only when the eyes were dissociated and/or one covered). Additional information regarding previous visual difficulties was obtained via a questionnaire.

### **Appendix B** Mediating factors

Intelligence quotient (IQ), attention, social cognition and behaviour were selected as potential mediating factors. Information on these domains was collected during a research clinic to which all ALSPAC participants were invited to attend at age 8. IQ was tested using a shortened form of the Wechsler Intelligence Scale for Children, 3rd edition (WISC-III)(31); this comprised five verbal subtests and five performance subtests from which a total age-scaled score was derived. Selective attention was assessed using the Sky Search Test, taken from the Test of Everyday Attention for children(32). The Diagnostic Analysis of Non-Verbal Accuracy (DANVA) faces subtest was used to test social cognition; we used a binary measure comprising the proportion of children with  $\geq 7$  errors on the facial expressions recognition task(33). Finally, behaviour was assessed using the Strength and Difficulties Questionnaire (SDQ), completed by parents when children were 9 years of age(34). This comprises questions relating to hyperactivity, emotional symptoms, conduct and peer problems.

### **Appendix C** Multiple imputation for missing data

To minimise the potential bias introduced by missing data, we performed multiple imputation using the mi impute command in Stata v.15.0. The exposure, confounding and mediating factors and outcome variables included in the final model were imputed in the sample of 8,205 that attended the research clinic at 7 years and were eligible for inclusion in the study sample. **In addition, we identified factors which predicted missingness using logistic regression analyses and imputed these variables (maternal smoking during pregnancy, male gender and maternal age <25 years). All of these variables were included in the final model, thus the assumption of "missing at random" is supported.**

Table ST1 summarises the variables and proportion of missing values and compares observed distributions to their distributions after the multivariate imputation for used to impute missing values.

| Variable                                                                        | Number missing (%) | Observed data                                                            | Complete data   |
|---------------------------------------------------------------------------------|--------------------|--------------------------------------------------------------------------|-----------------|
|                                                                                 |                    | % for categorical/binary variables or mean (SD) for continuous variables |                 |
| <b>Hearing impairment</b><br>(OME and/or conductive hearing loss)               | 802<br>(9.8%)      | 10.3                                                                     | 10.4            |
| <b>Visual impairment</b><br>(Amblyopia and/or strabismus and/or reduced acuity) | 1005<br>(12.2%)    | 6.9                                                                      | 7.0             |
| <b>Maternal age &lt;25 years</b>                                                | 451<br>(5.5%)      | 21.6                                                                     | 21.8            |
| <b>Admission to SCBU</b>                                                        | 821<br>(10.0%)     | 6.7                                                                      | 6.9             |
| <b>Ethnicity – white</b>                                                        | 860<br>(10.5%)     | 96.0                                                                     | 95.9            |
| <b>Maternal smoking during pregnancy</b>                                        | 1410<br>(17.2%)    | 20.0                                                                     | 20.3            |
| <b>Achievement of ≥ Level 4 at KS2 English</b>                                  | 49<br>(0.6%)       | 75.2                                                                     | 75.2            |
| <b>Achievement of ≥ Level 4 at KS2 Maths</b>                                    | 1050<br>(12.8%)    | 82.9                                                                     | 81.9            |
| <b>Achievement of ≥ Level 4 at KS2 Science</b>                                  | 47<br>(0.6%)       | 82.9                                                                     | 83.0            |
| <b>Achievement of ≥ 5 GCSEs at A* - C</b><br>(including Maths & English)        | 1256<br>(15.3%)    | 59.8                                                                     | 56.3            |
| <b>DANVA (≥7 mistakes)</b>                                                      | 2038<br>(24.8%)    | 22.3                                                                     | 23.3            |
| <b>Family Adversity Index (1 – 12)</b>                                          | 643<br>(7.8%)      | 1.75<br>(1.89)                                                           | 1.75<br>(1.89)  |
| <b>Wechsler Intelligence Scale (WISC-III)</b>                                   | 1547<br>(18.9%)    | 104.7<br>(16.3)                                                          | 104.5<br>(16.4) |
| <b>Strengths &amp; Difficulties Questionnaire (SDQ)</b>                         | 1703<br>(20.8%)    | 6.75<br>(4.84)                                                           | 6.77<br>(4.96)  |
| <b>Sky Search Test</b>                                                          | 1710<br>(20.8%)    | 5.20<br>(1.9)                                                            | 5.21<br>(2.0)   |
| <b>Index of Multiple Deprivations</b>                                           | 1968<br>(24.0%)    | 33.1                                                                     | 32.2            |
| 1                                                                               |                    | 19.6                                                                     | 19.3            |
| 2                                                                               |                    | 18.9                                                                     | 18.9            |
| 3                                                                               |                    | 15.3                                                                     | 15.8            |
| 4                                                                               |                    | 13.1                                                                     | 13.8            |
| <b>Parity</b>                                                                   | 716<br>(8.7%)      | 46.1                                                                     | 46.3            |
| 0                                                                               |                    | 36.0                                                                     | 35.8            |
| >=2                                                                             |                    | 17.9                                                                     | 17.9            |

*Table ST1: Proportion of data missing for the variables imputed, and distribution of values in the observed data and after imputation*

| Characteristic                                                   | Attended clinic at 7 years<br>(N = 8,283) |                                       | Did not attend clinic at 7<br>years (N = 6,402) |                                       | P-<br>value |
|------------------------------------------------------------------|-------------------------------------------|---------------------------------------|-------------------------------------------------|---------------------------------------|-------------|
|                                                                  | N                                         | Percentage of<br>complete data<br>(%) | N                                               | Percentage of<br>complete data<br>(%) |             |
| <b>Sex</b>                                                       |                                           |                                       |                                                 |                                       |             |
| Male                                                             | 4,201                                     | 50.7                                  | 3,335                                           | 52.1                                  | 0.09        |
| Female                                                           | 4,082                                     | 49.3                                  | 3,066                                           | 47.9                                  |             |
| <b>Low birthweight<br/>(&lt;2,500g)</b>                          |                                           |                                       |                                                 |                                       |             |
| Yes                                                              | 377                                       | 4.9                                   | 370                                             | 6.1                                   | 0.00        |
| Missing                                                          | 549                                       | -                                     | 343                                             | -                                     |             |
| <b>Premature<br/>(gestation &lt;37 weeks)</b>                    |                                           |                                       |                                                 |                                       |             |
| Yes                                                              | 451                                       | 5.8                                   | 394                                             | 6.4                                   | 0.11        |
| Missing                                                          | 455                                       | -                                     | 257                                             | -                                     |             |
| <b>Admission to SCBU</b>                                         |                                           |                                       |                                                 |                                       |             |
| Yes                                                              | 507                                       | 6.8                                   | 355                                             | 7.5                                   | 0.17        |
| Missing                                                          | 830                                       | -                                     | 1,644                                           | -                                     |             |
| <b>Ethnicity</b>                                                 |                                           |                                       |                                                 |                                       |             |
| White                                                            | 7,109                                     | 95.9                                  | 4,359                                           | 93.4                                  | 0.00        |
| Non-white                                                        | 301                                       | 4.1                                   | 308                                             | 6.6                                   |             |
| Missing                                                          | 873                                       | -                                     | 1,734                                           | -                                     |             |
| <b>Parity</b>                                                    |                                           |                                       |                                                 |                                       |             |
| 0                                                                | 3,477                                     | 42.0                                  | 2,293                                           | 35.8                                  | 0.00        |
| 1                                                                | 2,720                                     | 32.8                                  | 1,819                                           | 28.4                                  |             |
| ≥2                                                               | 1,362                                     | 16.4                                  | 1,253                                           | 16.4                                  |             |
| Missing                                                          | 724                                       | -                                     | 1,760                                           | -                                     |             |
| <b>Maternal age</b>                                              |                                           |                                       |                                                 |                                       |             |
| Under 25 years                                                   | 1,687                                     | 21.6                                  | 2,602                                           | 42.4                                  | 0.00        |
| Missing                                                          | 455                                       | 15.6                                  | 257                                             | 4.0                                   |             |
| <b>Breastfeeding</b>                                             |                                           |                                       |                                                 |                                       |             |
| Yes                                                              | 3,346                                     | 40.4                                  | 1,787                                           | 27.9                                  | 0.00        |
| Missing                                                          | 4,937                                     | 59.6                                  | 4,614                                           | 72.1                                  |             |
| <b>Maternal smoking<br/>during pregnancy</b>                     |                                           |                                       |                                                 |                                       |             |
| Yes                                                              | 1,371                                     | 20.0                                  | 1,529                                           | 36.0                                  | 0.00        |
| Missing                                                          | 1,429                                     | -                                     | 2,157                                           | -                                     |             |
| <b>Family Adversity Index<br/>at 2-4 years</b>                   |                                           |                                       |                                                 |                                       |             |
| <3                                                               | 5,646                                     | 74.0                                  | 3,096                                           | 63.3                                  | 0.00        |
| ≥3                                                               | 1,987                                     | 26.0                                  | 1,794                                           | 36.7                                  |             |
| Missing                                                          | 651                                       | -                                     | 1,511                                           | -                                     |             |
| <b>Index of Multiple<br/>Deprivations at 7 years</b>             |                                           |                                       |                                                 |                                       |             |
| 1                                                                | 2,079                                     | 33.0                                  | 318                                             | 23.2                                  | 0.00        |
| ≥2                                                               | 4,213                                     | 67.0                                  | 1,054                                           | 76.8                                  |             |
| Missing                                                          | 1,991                                     | -                                     | 5,029                                           | -                                     |             |
| <b>KS2 ≥ level 4</b>                                             |                                           |                                       |                                                 |                                       |             |
| <b>English</b>                                                   |                                           |                                       |                                                 |                                       |             |
| Yes                                                              | 6,172                                     | 75.0                                  | 3,616                                           | 56.9                                  | 0.00        |
| Missing                                                          | 995                                       | -                                     | 1,653                                           | -                                     |             |
| <b>Maths</b>                                                     |                                           |                                       |                                                 |                                       |             |
| Yes                                                              | 5,962                                     | 82.6                                  | 3,536                                           | 69.1                                  | 0.00        |
| Missing                                                          | 1,050                                     | -                                     | 1,212                                           | -                                     |             |
| <b>Science</b>                                                   |                                           |                                       |                                                 |                                       |             |
| Yes                                                              | 6,810                                     | 82.7                                  | 4,346                                           | 31.7                                  | 0.00        |
| Missing                                                          | 992                                       | -                                     | 1,178                                           | -                                     |             |
| <b>GCSEs ≥5 grade A*-C<br/>including Maths &amp;<br/>English</b> |                                           |                                       |                                                 |                                       |             |
| Yes                                                              | 4,177                                     | 59.5                                  | 1,875                                           | 37.2                                  | 0.00        |
| <b>SEN at KS2</b>                                                |                                           |                                       |                                                 |                                       |             |
| Yes (School action, Action<br>plus or SEN)                       | 948                                       | 13.7                                  | 1,162                                           | 22.8                                  |             |
| Missing                                                          | 1,379                                     | -                                     | 1,307                                           | -                                     |             |
| <b>SEN at KS4</b>                                                |                                           |                                       |                                                 |                                       |             |
| Yes (School action, Action<br>plus or SEN)                       | 733                                       | 11.3                                  | 859                                             | 18.2                                  |             |
| Missing                                                          | 1,813                                     | -                                     | 1,689                                           | -                                     |             |

*Table ST2: Demographic characteristics of children that attended the ALSPAC research clinic at 7 years compared to those that did not attend. The student's T-test was used to calculate p-values.*

| Characteristic                                   | Normal Vision & Hearing<br>(n= 2,473) |                | Hearing Impairment alone<br>(n=247) |                |         | Visual Impairment alone<br>(n=175) |                |         | Co-occurring hearing & visual Impairment (n=14) |                |         |
|--------------------------------------------------|---------------------------------------|----------------|-------------------------------------|----------------|---------|------------------------------------|----------------|---------|-------------------------------------------------|----------------|---------|
|                                                  | N                                     | Percentage (%) | N                                   | Percentage (%) | P-value | N                                  | Percentage (%) | P-value | N                                               | Percentage (%) | P-value |
| <b>Sex</b>                                       |                                       |                |                                     |                |         |                                    |                |         |                                                 |                |         |
| Male                                             | 1,218                                 | 49.3           | 125                                 | 50.6           | 0.68    | 79                                 | 45.1           | 0.29    | 10                                              | 71.4           | 0.10    |
| Female                                           | 1,255                                 | 50.7           | 122                                 | 49.4           |         | 96                                 | 54.9           |         | <5                                              | 28.6           |         |
| <b>Low birthweight (&lt;2,500g)</b>              | 89                                    | 3.6            | 10                                  | 4.1            | 0.72    | 11                                 | 6.3            | 0.07    | <5                                              | 7.1            | 0.48    |
| <b>Premature (gestation &lt;37 weeks)</b>        | 121                                   | 4.9            | 16                                  | 6.5            | 0.28    | 11                                 | 6.3            | 0.41    | <5                                              | 14.3           | 0.11    |
| <b>Admission to SCBU</b>                         | 134                                   | 5.4            | 23                                  | 9.3            | 0.01    | 11                                 | 6.3            | 0.62    | <5                                              | 0              | 0.37    |
| <b>Ethnicity</b>                                 |                                       |                |                                     |                |         |                                    |                |         |                                                 |                |         |
| White                                            | 2,398                                 | 97.0           | 241                                 | 97.6           | 0.60    | 172                                | 98.3           | 0.32    | 14                                              | 100            | 0.51    |
| Non-white                                        | 75                                    | 3.0            | 6                                   | 2.4            |         | <5                                 | 1.7            |         | <5                                              | 0              |         |
| <b>Parity</b>                                    |                                       |                |                                     |                |         |                                    |                |         |                                                 |                |         |
| 0                                                | 1,122                                 | 45.4           | 121                                 | 49.0           | 0.28    | 77                                 | 44.0           | 0.73    | 6                                               | 42.9           | 0.85    |
| 1                                                | 920                                   | 37.2           | 79                                  | 32.0           | 0.11    | 78                                 | 44.6           | 0.05    | 6                                               | 42.9           | 0.66    |
| ≥2                                               | 431                                   | 17.4           | 47                                  | 19.0           | 0.53    | 20                                 | 11.4           | 0.04    | <5                                              | 14.3           | 0.76    |
| <b>Maternal age &lt;25 years</b>                 | 452                                   | 18.3           | 48                                  | 19.4           | 0.65    | 39                                 | 22.3           | 0.19    | <5                                              | 14.3           | 0.70    |
| <b>Breastfed</b>                                 | 1,103                                 | 44.6           | 106                                 | 42.9           | 0.61    | 85                                 | 48.6           | 0.31    | <5                                              | 28.6           | 0.23    |
| <b>Maternal smoking during pregnancy</b>         | 445                                   | 18.0           | 39                                  | 15.8           | 0.39    | 43                                 | 24.6           | 0.03    | 5                                               | 35.7           | 0.09    |
| <b>Family Adversity Index at 2-4 years</b>       |                                       |                |                                     |                |         |                                    |                |         |                                                 |                |         |
| <3                                               | 2,089                                 | 84.5           | 205                                 | 83.0           | 0.54    | 139                                | 79.4           | 0.08    | 11                                              | 78.6           | 0.54    |
| ≥3                                               | 384                                   | 15.5           | 42                                  | 17.0           |         | 36                                 | 20.6           |         | <5                                              | 21.4           |         |
| <b>Index of Multiple Deprivations at 7 years</b> |                                       |                |                                     |                |         |                                    |                |         |                                                 |                |         |
| 1                                                | 822                                   | 33.2           | 72                                  | 29.2           | 0.19    | 54                                 | 30.9           | 0.52    | 5                                               | 35.7           | 0.84    |
| ≥2                                               | 1,652                                 | 66.8           | 175                                 | 70.9           |         | 121                                | 69.1           |         | 9                                               | 64.2           |         |

Table ST3: Demographic characteristics of children according to their hearing and vision status. NB. “<5” may include zero. The student’s T-test was used to calculate p-values.

|                                                              | KS2 English |                       | KS2 Maths |                       | KS2 Science |                       |
|--------------------------------------------------------------|-------------|-----------------------|-----------|-----------------------|-------------|-----------------------|
|                                                              | N           | Percentage (95% CI)   | N         | Percentage (95% CI)   | N           | Percentage (95% CI)   |
| <b>Normal vision &amp; hearing<br/>N=2,473</b>               | 2,306       | 93.3<br>(92.3 – 94.2) | 2,429     | 98.2<br>(97.7 – 98.7) | 2,421       | 97.9<br>(97.3 – 98.5) |
| <b>Hearing impairment<br/>N= 247</b>                         | 226         | 91.5<br>(88.0 – 95.0) | 239       | 96.8<br>(94.5 – 99.0) | 241         | 97.6<br>(95.6 – 99.5) |
| <b>Visual impairment<br/>N= 175</b>                          | 149         | 85.1<br>(79.8 – 90.5) | 161       | 92.0<br>(87.9 – 96.1) | 165         | 94.3<br>(90.8 – 97.8) |
| <b>Co-occurring hearing &amp; visual impairment<br/>N=14</b> | 10          | 71.4<br>(44.4 – 98.5) | 12        | 85.7<br>(64.8 - >100) | 13          | 92.9<br>(77.4 - >100) |

Table ST4: Proportions of children achieving level 4 or above at Key Stage 2 English, Maths and Science by hearing and vision status

|                           | Normal hearing & vision<br>N = 2480 | Hearing impairment<br>N= 247 | Visual impairment<br>N= 175 | Co-occurring hearing & visual impairment<br>N=14 | P-value |
|---------------------------|-------------------------------------|------------------------------|-----------------------------|--------------------------------------------------|---------|
| <b>SEN support at KS2</b> |                                     |                              |                             |                                                  |         |
| Number                    | 153                                 | 21                           | 20                          | <5                                               | 0.02    |
| Percent (%)<br>(95% CI)   | 6.2<br>(5.2 – 7.7)                  | 8.5<br>(5.4 – 12.3)          | 11.4<br>(7.0 – 16.3)        | 14.3<br>(<0 – 35.3)                              |         |
| <b>SEN support at KS4</b> |                                     |                              |                             |                                                  |         |
| Number                    | 147                                 | 17                           | 21                          | <5                                               | 0.01    |
| Percent (%)<br>(95% CI)   | 5.94<br>(5.0 – 6.9)                 | 9.7%<br>(5.4 – 12.3)         | 11.05<br>(6.6 – 15.6)       | 28.6<br>(1.5 – 55.6)                             |         |

*Table ST5: Proportions of children receiving SEN support at KS2 & KS4 by hearing and vision status. The Pearson's chi squared test was used to calculate p-values.*

*Table ST6: Multivariate regression models using the imputed dataset (N=8,205)*

| KS2 Maths: Achievement of $\geq$ level 4        |                                |             |                                            |             |                                                                        |             |                              |             |                       |             |                                                              |             |
|-------------------------------------------------|--------------------------------|-------------|--------------------------------------------|-------------|------------------------------------------------------------------------|-------------|------------------------------|-------------|-----------------------|-------------|--------------------------------------------------------------|-------------|
|                                                 | Univariate logistic regression |             | Model 1 : Male, age at testing, SEN at KS2 |             | Model 2: Model 1 & maternal age <25, parity & smoking during pregnancy |             | Model 3: Model 2 & FAI & IMD |             | Model 4: Model 3 & IQ |             | Model 5: Model 4 & behaviour, social perceptions & attention |             |
|                                                 | OR                             | 95% CI      | OR                                         | 95% CI      | OR                                                                     | 95% CI      | OR                           | 95% CI      | OR                    | 95% CI      | OR                                                           | 95% CI      |
| Hearing impairment (n=852)                      | 0.83                           | 0.68 – 1.01 | 0.90                                       | 0.71 – 1.15 | 0.90                                                                   | 0.71 – 1.15 | 0.90                         | 0.71 – 1.15 | 0.91                  | 0.72 – 1.16 | 0.91                                                         | 0.71 – 1.15 |
| Visual impairment (n=573)                       | 0.66                           | 0.53 – 0.83 | 0.81                                       | 0.61 – 1.07 | 0.80                                                                   | 0.60 – 1.06 | 0.81                         | 0.61 – 1.07 | 0.81                  | 0.61 – 1.08 | 0.82                                                         | 0.61 – 1.08 |
| Co-occurring hearing & visual impairment (n=45) | 0.33                           | 0.17 – 0.63 | 0.47                                       | 0.22 – 1.01 | 0.46                                                                   | 0.21 – 1.01 | 0.46                         | 0.21 – 1.01 | 0.46                  | 0.21 – 1.00 | 0.46                                                         | 0.21 – 1.00 |

*demonstrating the likelihood children achieved  $\geq$ level 4 at KS2 Maths according to hearing and visual status and after adjustment for confounding variables (models 1-3) and mediating factors (models 4-5). OR=Odds Ratio*

| KS2 Science: Achievement of $\geq$ level 4      |                                |             |                                            |             |                                                                        |             |                              |             |                       |             |                                                              |             |
|-------------------------------------------------|--------------------------------|-------------|--------------------------------------------|-------------|------------------------------------------------------------------------|-------------|------------------------------|-------------|-----------------------|-------------|--------------------------------------------------------------|-------------|
|                                                 | Univariate logistic regression |             | Model 1 : Male, age at testing, SEN at KS2 |             | Model 2: Model 1 & maternal age <25, parity & smoking during pregnancy |             | Model 3: Model 2 & FAI & IMD |             | Model 4: Model 3 & IQ |             | Model 5: Model 4 & behaviour, social perceptions & attention |             |
|                                                 | OR                             | 95% CI      | OR                                         | 95% CI      | OR                                                                     | 95% CI      | OR                           | 95% CI      | OR                    | 95% CI      | OR                                                           | 95% CI      |
| Hearing impairment (n=852)                      | 0.89                           | 0.73 – 1.08 | 0.97                                       | 0.77 – 1.22 | 0.97                                                                   | 0.77 – 1.22 | 0.97                         | 0.77 – 1.22 | 0.99                  | 0.78 – 1.24 | 0.99                                                         | 0.78 – 1.24 |
| Visual impairment (n=573)                       | 0.69                           | 0.54 – 0.87 | 0.83                                       | 0.64 – 1.08 | 0.84                                                                   | 0.65 – 1.09 | 0.84                         | 0.65 – 1.10 | 0.86                  | 0.66 – 1.12 | 0.87                                                         | 0.66 – 1.13 |
| Co-occurring hearing & visual impairment (n=45) | 0.33                           | 0.18 – 0.61 | 0.46                                       | 0.22 – 0.95 | 0.47                                                                   | 0.23 – 0.97 | 0.47                         | 0.23 – 0.97 | 0.48                  | 0.23 – 0.99 | 0.48                                                         | 0.23 – 0.99 |

*Table ST7: Multivariate regression models using the imputed dataset (N=8,205) demonstrating the likelihood children achieved  $\geq$ level 4 at KS2 Science according to hearing and visual status and after adjustment for confounding variables (models 1-3) and mediating factors (models 4-5). OR=Odds Ratio*

| KS2 English: Achievement of $\geq$ level 4      |                                |             |                                            |             |                                                                        |             |                              |             |
|-------------------------------------------------|--------------------------------|-------------|--------------------------------------------|-------------|------------------------------------------------------------------------|-------------|------------------------------|-------------|
|                                                 | Univariate logistic regression |             | Model 1 : Male, age at testing, SEN at KS2 |             | Model 2: Model 1 & maternal age <25, parity & smoking during pregnancy |             | Model 3: Model 2 & FAI & IMD |             |
|                                                 | OR                             | 95% CI      | OR                                         | 95% CI      | OR                                                                     | 95% CI      | OR                           | 95% CI      |
| Hearing impairment (n=261)                      | 0.74                           | 0.48 – 1.15 | 0.81                                       | 0.50 – 1.32 | 0.80                                                                   | 0.49 – 1.31 | 0.76                         | 0.47 – 1.24 |
| Visual impairment (n=189)                       | 0.39                           | 0.30 – 0.60 | 0.42                                       | 0.26 – 0.67 | 0.42                                                                   | 0.26 – 0.68 | 0.42                         | 0.26 – 0.68 |
| Co-occurring hearing & visual impairment (n=14) | 0.20                           | 0.06 – 0.64 | 0.21                                       | 0.06 – 0.81 | 0.21                                                                   | 0.05 – 0.84 | 0.21                         | 0.05 – 0.83 |
| KS2 Maths: Achievement of $\geq$ level 4        |                                |             |                                            |             |                                                                        |             |                              |             |
|                                                 | Univariate logistic regression |             | Model 1 : Male, age at testing, SEN at KS2 |             | Model 2: Model 1 & maternal age <25, parity & smoking during pregnancy |             | Model 3: Model 2 & FAI & IMD |             |
|                                                 | OR                             | 95% CI      | OR                                         | 95% CI      | OR                                                                     | 95% CI      | OR                           | 95% CI      |
| Hearing impairment (n=261)                      | 0.56                           | 0.28 – 1.11 | 0.64                                       | 0.30 – 1.33 | 0.66                                                                   | 0.31 – 1.40 | 0.58                         | 0.27 – 1.23 |
| Visual impairment (n=189)                       | 0.21                           | 0.12 – 0.38 | 0.24                                       | 0.12 – 0.46 | 0.21                                                                   | 0.11 – 0.41 | 0.20                         | 0.10 – 0.41 |
| Co-occurring hearing & visual impairment (n=14) | 0.14                           | 0.03 – 0.64 | 0.15                                       | 0.02 – 0.91 | 0.13                                                                   | 0.02 – 0.87 | 0.10                         | 0.02 – 0.57 |
| KS2 Science: Achievement of $\geq$ level 4      |                                |             |                                            |             |                                                                        |             |                              |             |
|                                                 | Univariate logistic regression |             | Model 1 : Male, age at testing, SEN at KS2 |             | Model 2: Model 1 & maternal age <25, parity & smoking during pregnancy |             | Model 3: Model 2 & FAI & IMD |             |
|                                                 | OR                             | 95% CI      | OR                                         | 95% CI      | OR                                                                     | 95% CI      | OR                           | 95% CI      |
| Hearing impairment (n=261)                      | 0.87                           | 0.39 – 1.92 | 1.00                                       | 0.44 – 2.28 | 1.00                                                                   | 0.43 – 2.31 | 0.89                         | 0.38 – 2.08 |
| Visual impairment (n=189)                       | 0.35                           | 0.18 – 0.68 | 0.46                                       | 0.23 – 0.94 | 0.49                                                                   | 0.23 – 1.03 | 0.53                         | 0.24 – 1.16 |
| Co-occurring hearing & visual impairment (n=14) | 0.31                           | 0.04 – 2.42 | 0.38                                       | 0.04 – 3.57 | 0.49                                                                   | 0.05 – 5.05 | 0.35                         | 0.04 – 3.21 |

Table ST8-ST10: Multivariate regression models using complete cases (N=2,909) demonstrating the likelihood children achieved  $\geq$ level 4 at KS2 English, Maths & Science according to hearing and visual status and after adjustment for confounding variables (models 1-3). OR=Odds Ratio

| KS4: Achievement of $\geq 5$ GCSEs at A*-C, including Maths & English |                                |             |                                            |             |                                                                        |             |                              |             |                                                             |             |
|-----------------------------------------------------------------------|--------------------------------|-------------|--------------------------------------------|-------------|------------------------------------------------------------------------|-------------|------------------------------|-------------|-------------------------------------------------------------|-------------|
|                                                                       | Univariate logistic regression |             | Model 1 : Male, SCBU admission, SEN at KS4 |             | Model 2: Model 1 & maternal age <25, parity & smoking during pregnancy |             | Model 3: Model 2 & FAI & IMD |             | Model 4: Model 3 & KS2 English, Maths & Science performance |             |
|                                                                       | OR                             | 95% CI      | OR                                         | 95% CI      | OR                                                                     | 95% CI      | OR                           | 95% CI      | OR                                                          | 95% CI      |
| Hearing impairment (n=261)                                            | 0.66                           | 0.51 – 0.86 | 0.69                                       | 0.52 – 0.91 | 0.66                                                                   | 0.50 – 0.88 | 0.64                         | 0.48 – 0.86 | 0.64                                                        | 0.47 – 0.87 |
| Visual impairment (n=189)                                             | 0.91                           | 0.66 – 1.26 | 1.00                                       | 0.71 – 1.41 | 1.08                                                                   | 0.76 – 1.53 | 1.12                         | 0.77 – 1.59 | 1.47                                                        | 0.98 – 2.21 |
| Co-occurring hearing & visual impairment (n=14)                       | 0.51                           | 0.18 – 1.49 | 0.79                                       | 0.25 – 2.53 | 0.82                                                                   | 0.24 – 2.79 | 0.77                         | 0.22 – 2.64 | 1.18                                                        | 0.29 – 4.74 |

*Table ST11: Multivariate regression models using complete cases (N=2,909) demonstrating the likelihood children achieved  $\geq$  level 4 at KS2 English, Maths & Science and  $\geq 5$  GCSEs at A\*-C grade (including Maths & English), according to hearing and visual status and after adjustment for. OR=Odds Ratio*
